# Supplementary material for: Covalently modified carboxyl side chains on cell surface leads to a novel method toward topology analysis of transmembrane proteins
Source: PubMed Central journal article supplement (PMC6823493; doi:10.1038/s41598-019-52188-4), 2019-10-31
Supplement: 41598_2019_52188_MOESM1_ESM.pdf [file 41598_2019_52188_MOESM1_ESM.pdf]

## Supplementary information for

### **Covalently modified carboxyl side chains on cell surface leads to a novel method toward topology analysis of transmembrane proteins**

Anna Müller<sup>1</sup>, Tamás Langó<sup>1</sup>, Lilla Turiák<sup>2</sup>, András Ács<sup>2</sup>, György Várady<sup>1</sup>, Nóra Kucsma<sup>1</sup>, László Drahos<sup>2</sup> & Gábor E. Tusnady<sup>1\*</sup>

<sup>1</sup> Institute of Enzymology, RCNS, Hungarian Academy of Sciences, Magyar Tudósok krt 2, Budapest, H-1117 Hungary.

<sup>2</sup> Institute of Organic Chemistry, RCNS, Hungarian Academy of Sciences, Magyar Tudósok krt 2, Budapest, H-1117 Hungary.

\*Correspondence and requests for materials should be addressed to G.E.T. (email: tusnady.gabor@ttk.mta.hu)

### **Supplementary methods**

#### Dot Blot analysis

The labelled and washed cells were lysed and pelleted as written in Membrane Preparation section. The supernatants of the 1700 g centrifugation were blotted onto a PVDF membrane using a Bio-Dot microfiltration apparatus.

PVDF membranes were blocked by a blocking buffer (pH=7.4; 25 mM TRIS-HCl, 2.7 mM KCl, 137 mM NaCl, 0.05% Tween-20) supplemented with 6% BSA for 45 minutes at room temperature. It was followed by incubation with HRP-conjugated Streptavidin (50000x diluted) for 45 minutes at room temperature also in blocking buffer. For the visualisation of the biotinylated peptides, Immobilon Western Chemiluminescent HRP Substrate was applied. All the images were captured by a ChemiDoc XRS+ Imaging system (Bio-Rad Laboratories, Hercules, CA, USA).

## Supplementary figures

### Supplementary Figure 1. The ionisation states of Biotinyl Cystamine depending on pH

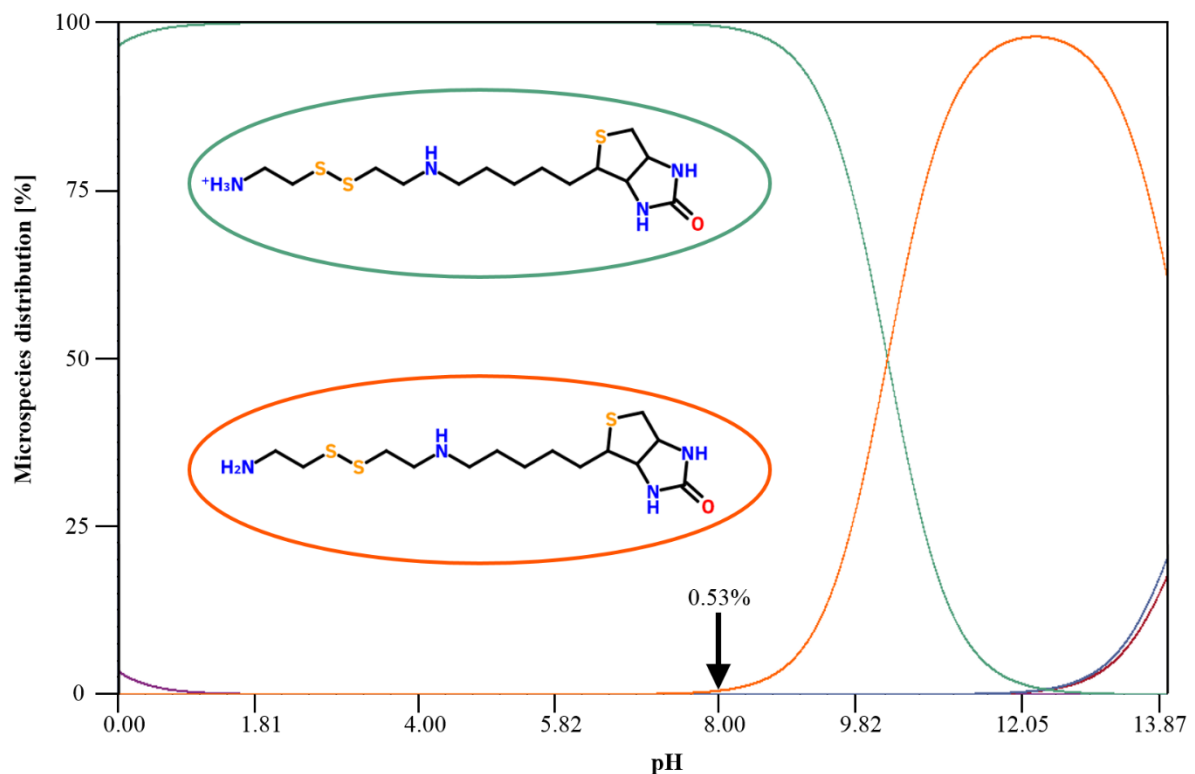

### Supplementary Figure 1. The ionisation states of the applied biotinylating agent

The presence of protein amine residues in the extracellular region is also significant because deprotonated lysine side chains are also able to nucleophile attack any available activated carboxyl group. According to the diagram created by Marvin Sketch 19.2 (ChemAxon Ltd., Budapest, Hungary), 0.53% of the amount of the applied biotinylating agent (Biotinyl Cystamine) is deprotonated at the applied pH=8.0 and the temperature of 4°C. This is what makes the amid-forming reaction possible because the equilibrium will be shifted due to the appearance of the covalent bounds.

### Supplementary Figure 2. Full-length SDS-PAGE and Western Blot pictures

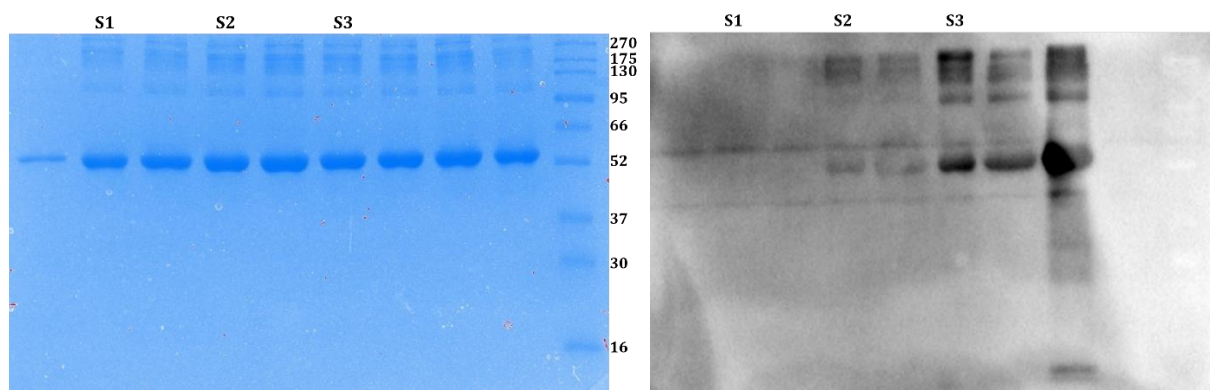

### Supplementary Figure 2. Full-length SDS-PAGE and Western Blot pictures

### Supplementary Figure 3. Dot Blot analysis of the labelling efficiencies

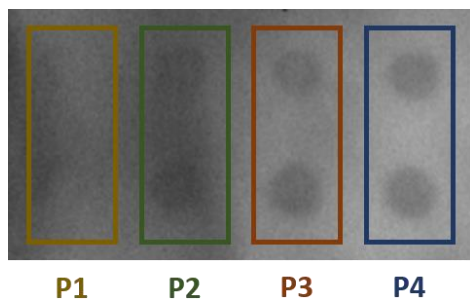

|           |                               |
|-----------|-------------------------------|
| <b>P1</b> | 0 mM EDC & 0 mM Sulfo-NHS     |
| <b>P2</b> | 50 mM EDC & 100 mM Sulfo-NHS  |
| <b>P3</b> | 100 mM EDC & 200 mM Sulfo-NHS |
| <b>P4</b> | 150 mM EDC & 300 mM Sulfo-NHS |

### Supplementary Figure 3. Dot Blot analysis of the labelled membrane samples

In the preliminary cell experiments, we tested four different concentrations of the activating agents. As a result, we identified the highest biotinylation yield at around 50 mM EDC and 100 mM Sulfo-NHS concentrations.

### Supplementary Figure 4. Flow cytometry – Propidium Iodide uptake

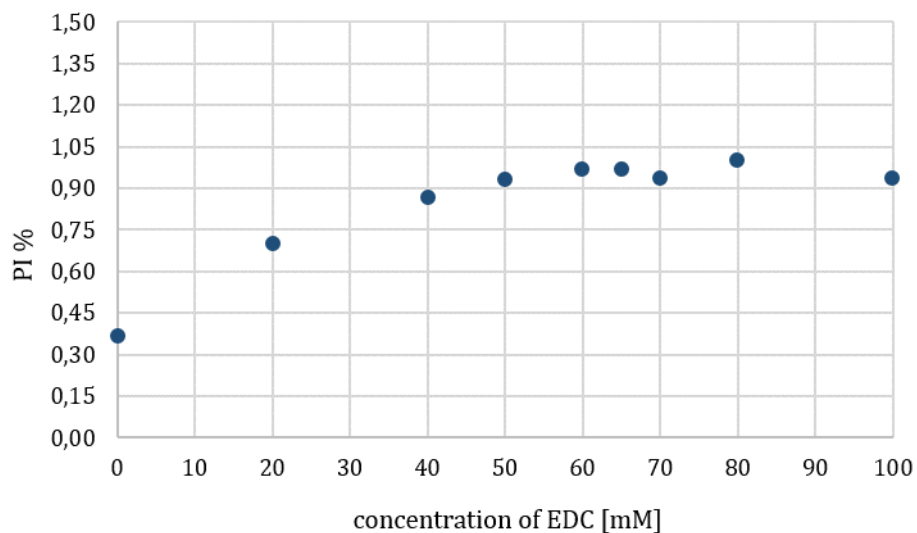

### Supplementary Figure 4. The Propidium Iodide uptake of gated cells

Beside the detection of CF488A anti-biotin fluorescent antibody, it was also necessary to measure the integrity of the analysed cells. For the experiments, we applied Propidium Iodide DNA-dye that is only able to enter the intracellular region of damaged cells. Here, we present the percentage of gated cells that emitted the fluorescence of the agent.

### Supplementary Figure 5. Control experiments by confocal microscopy

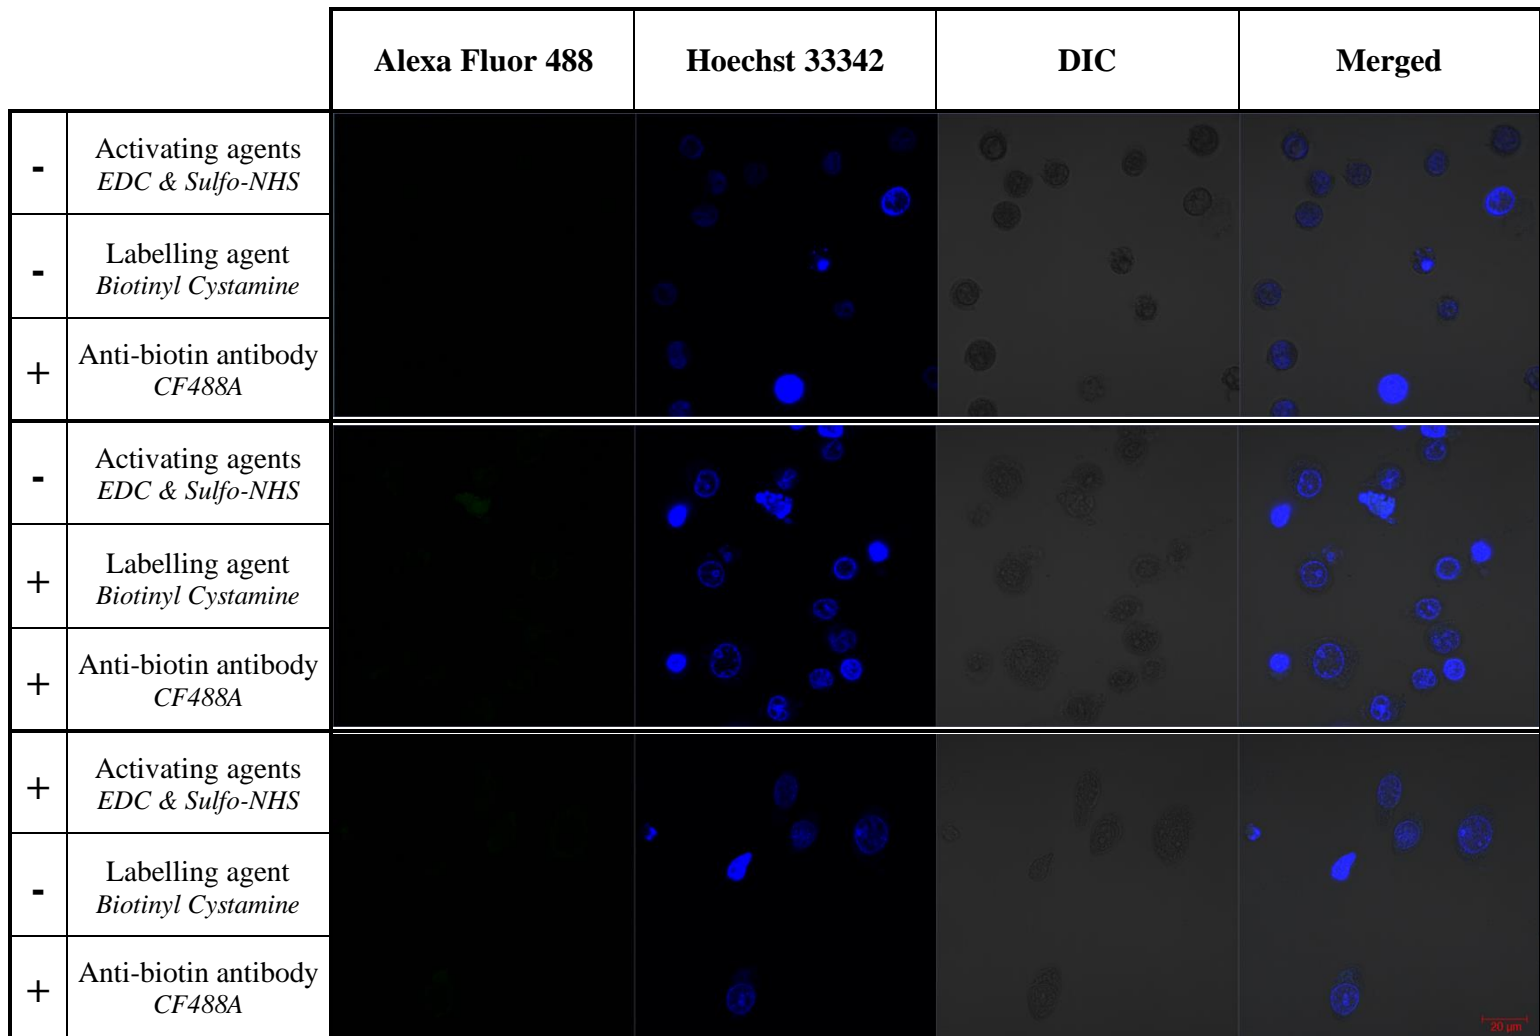

### Supplementary Figure 5. Control experiments for surface protein biotinylation of HL60 cells.

Measuring the suspected maximal labelling efficiency required confocal microscopy control experiments to prove the appearance of no background fluorescence. The first lane shows the target of the measurement (from left to right: Alexa Fluor 488 conjugated anti-biotin antibody background fluorescence, Hoechst 33342 DNA dye fluorescence, Differential Interference Contrast and Merged picture). The HL60 cells were treated with different reagents, the first column indicates the applied agents for each sample („+“ with or „-“ without the reagent). Scale bar: 20  $\mu$ m. The images were created by Zeiss ZEN lite software (Carl Zeiss, Oberkochen, Germany).

**Supplementary Figure 6. Dot Blot analysis of the membrane samples and the quality of the affinity chromatography**

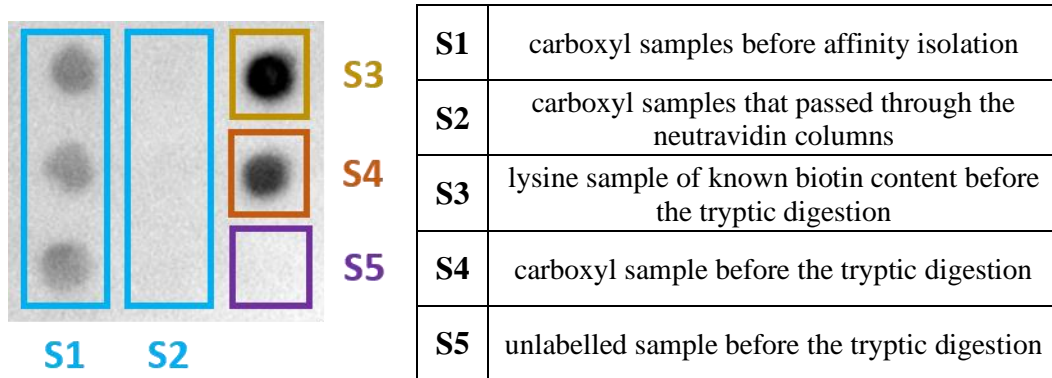

**Supplementary Figure 6. Dot Blot analysis of the membrane samples and the quality of the affinity chromatography**

Biotin content of different membrane preparations and several fractions of the affinity chromatography were analysed by Dot Blot technique. Considering S1 and S2 dots, it is clear that the biotinylated components remained bound to the neutravidin beads after the incubation step. Admittedly, S5 dot ensures that there is no background biotin remained from original cell metabolism that would mislead the detection of the biotinylated membrane fraction.

## Supplementary Figure 7. Topology predictions of Leukocyte cell surface antigen CD47

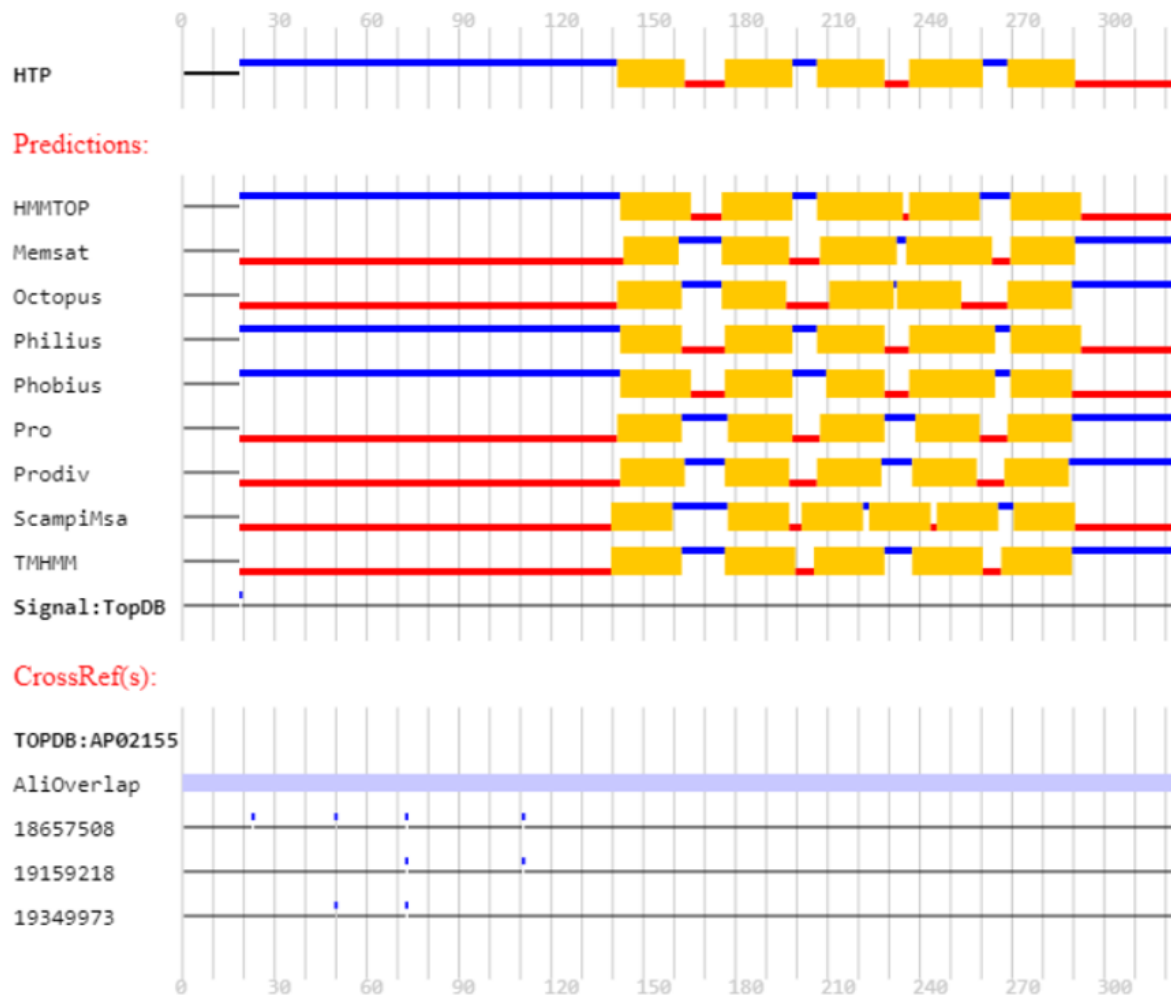

## Supplementary Figure 7. Topology predictions of Leukocyte cell surface antigen CD47

According to the Human Transmembrane Proteome (HTP) database (<http://htp.enzim.hu/>), the topology predictions of Leukocyte cell surface antigen CD47 protein are quite controversial although four extracellular amino acid have already been determined in the first region. Blue lines belong to the extracellular region and red lines to the intracellular. Thicker yellow units represent the membrane region.

**Supplementary Figure 8. Solved Structure for AAAT\_HUMAN protein by PyMOL**

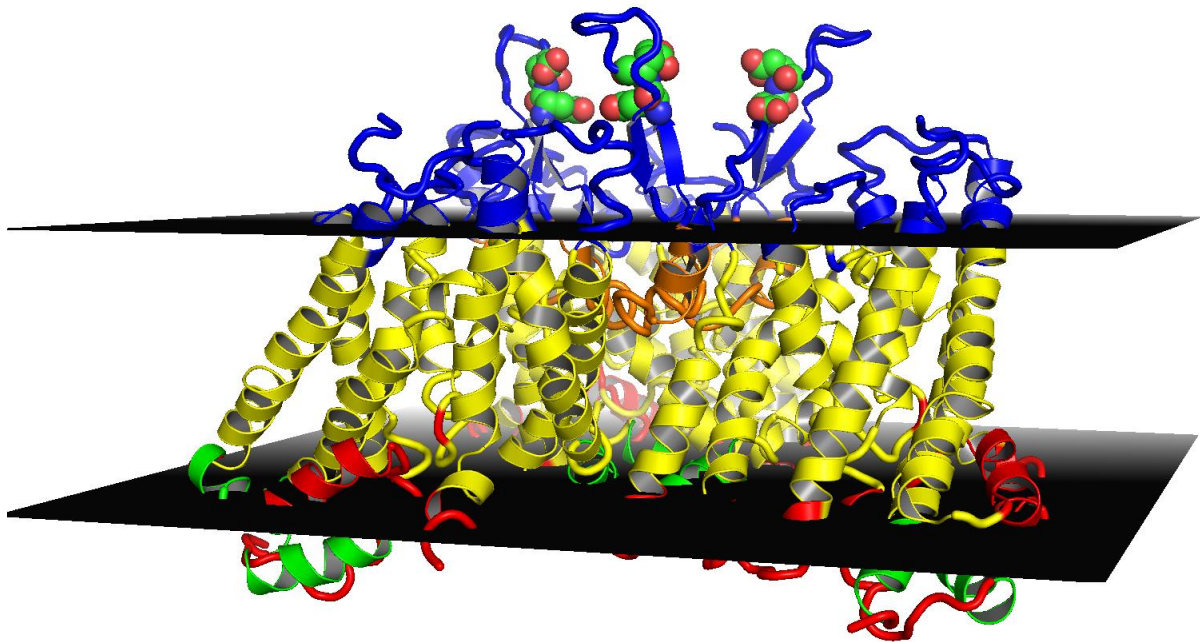

**Supplementary Figure 8. Solved Structure for AAAT\_HUMAN protein by PyMOL**

The 3D structure of the trimer Neutral amino acid transporter B(0) protein (PDB: 6GCT) was solved previously by cryo-electron microscopy. The structure of the protein is represented by using PyMOL software (version 1.8.4.0 Open-Source, <https://pymol.org/>). The colours are based on topology (blue: extracellular region; yellow: membrane region; orange: re-entrant loop; red: cytosolic region; black sheets: borders of the membrane). The captured extracellular amino acids are marked with green-red spheres.

## **Supplementary Tables**

### **Supplementary Table 1. List of the labelled BSA peptides**

see Supplementary\_Table\_1.xlsx

### **Supplementary Table 2. List of the labelled HL60 peptides and TMP positions**

see Supplementary\_Table\_2.xlsx

### **Supplementary Table 3. List of the predicted topology of the modified TMPs including the modified aspartic and glutamic acids from our experiments and already existing other experimental results**

see Supplementary\_Table\_3.pdf



**Supplementary Table 4. Byonic Search Engine parameters**

|                                                     |                        |
|-----------------------------------------------------|------------------------|
| <b>Protein database</b>                             | Swissprot Homo Sapiens |
| <b>Spectrum-level FDR</b>                           | Auto cut               |
| <b>Cleavage residues</b>                            | RK                     |
| <b>Digest cutter</b>                                | C-terminal cutter      |
| <b>Peptide termini</b>                              | Semi specific N-ragged |
| <b>Maximum number of missed cleavages</b>           | 2                      |
| <b>Fragmentation type</b>                           | CID low energy         |
| <b>Precursor tolerance</b>                          | 10.0 ppm               |
| <b>Fragment tolerance</b>                           | 20.0 ppm               |
| <b>Charges applied to charge-unassigned spectra</b> | 1,2,3                  |
| <b>Precursor mass max</b>                           | 10000.0                |
| <b>N-glycan search</b>                              | None                   |
| <b>O-glycan search</b>                              | None                   |
| <b>Off by x isotopes</b>                            | -2,-1,0,+1,+2          |
| <b>Contaminants added</b>                           | false                  |
| <b>Decoys added</b>                                 | true                   |
| <b>Disulfide Enable</b>                             | false                  |
| <b>Trisulfide Enable</b>                            | false                  |
| <b>DSS Crosslink Enable</b>                         | false                  |
| <b>Custom Crosslink Enable</b>                      | false                  |
| <b>Wildcard Enable</b>                              | 0                      |
| <b>Combyne cut off score</b>                        | Auto                   |
| <b>Protein FDR cutoff</b>                           | 1%                     |
| <b>Focused DB created</b>                           | false                  |
| <b>Export mzIdentML</b>                             | false                  |
| <b>Score version</b>                                | 2                      |
| <b>precursor assignment flags</b>                   | 2                      |
| <b>po NumberMonosReturn</b>                         | 2                      |
| <b>Lock mass list</b>                               | None                   |
| <b>common modifications max</b>                     | 1                      |
| <b>rare modifications max</b>                       | 1                      |

**Supplementary Table 5. The allowed covalent modifications in the Byonic Search Engine**

| Name            | Mass shift (Da) | Target amino acid or protein terminal                          | Structure                                                                           |
|-----------------|-----------------|----------------------------------------------------------------|-------------------------------------------------------------------------------------|
| Carbamidomethyl | +57.021464      | Cysteine (C)                                                   | 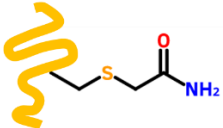 |
| Custom          | +59.019355      | Aspartic acid (E),<br>Glutamic acid (D),<br>Protein C-terminal |  |
| Custom          | +116.040819     | Aspartic acid (E),<br>Glutamic acid (D),<br>Protein C-terminal |   |

**Supplementary Table 5. The allowed covalent modifications in the Byonic Search Engine**

Based on the applied experimental parameters, there are three covalent modifications that we are directly searching for in the MS results. Carbamidomethyl modifications of +57.021464 Da can occur on the Cysteine side chains in every region (both extracellular and intracellular) of the whole protein because Iodoacetamide alkylating agent is applied in several phases of the protocol (also after the isolation of TMPs). The Custom modifications of +59.019355 and +116.040819 Da appear only in the extracellular region of the TMPs because we modify the carboxyl groups of the intact cell surface at the beginning of the protocol. Here we also present the structure of these modifications completed with their target location in native proteins (Yellow curve: protein structure, Blue arch: membrane).

**Supplementary Table 6. Additional modifications in the Byonic Search Engine**

| <b>Name</b>    | <b>Mass shift (Da)</b> | <b>Location</b>          |
|----------------|------------------------|--------------------------|
| Dioxidation    | +31.989829             | Tryptophan               |
| Deamidated     | +0.984016              | Asparagine               |
| Deamidated     | +0.984016              | Glutamine                |
| Gln → pyro-Glu | -17.026549             | Glutamine N-terminal     |
| Glu → pyro-Glu | -18.010565             | Glutamic acid N-terminal |
| Ammonia-loss   | -17.026549             | Cysteine N-terminal      |
| Acetyl         | +42.010565             | Protein N-terminal       |

**Supplementary Table 7. List of reagents and their suppliers**

| <b>Name</b>                                                  | <b>Producer</b>          |
|--------------------------------------------------------------|--------------------------|
| Ammonium bicarbonate                                         | Sigma-Aldrich            |
| Anti-Biotin-CF Dye Conjugate CF488A                          | Sigma-Aldrich            |
| Biotinyl Cystamine                                           | Santa Cruz Biotechnology |
| Bovine Serum Albumin                                         | Sigma-Aldrich            |
| Coomassie Brilliant Blue CBB R-250                           | Bio-Rad                  |
| Disodium phosphate                                           | Sigma-Aldrich            |
| 1,4-dithiothreitol                                           | Thermo Scientific        |
| 1-ethyl-3-(3-dimethylaminopropyl) carbodiimide hydrochloride | Thermo Scientific        |
| Fetal Bovine Serum                                           | Thermo Scientific        |
| Glycine                                                      | Sigma-Aldrich            |
| Hoechst 33342 DNA-dye                                        | Molecular Probes         |
| HRP-conjugated Streptavidin                                  | Merck                    |
| Immobilon Western Chemiluminescent HRP Substrate             | Millipore                |
| Iodoacetamide                                                | Sigma-Aldrich            |
| Monopotassium phosphate                                      | Sigma-Aldrich            |
| 2-(4-morpholino) ethanesulfonic acid hydrate                 | Sigma-Aldrich            |
| Na-tosyl-L-lysine chloromethyl ketone hydrochloride (TLCK)   | Sigma-Aldrich            |
| $\alpha$ 2-3,6,8,9 Neuraminidase A                           | New England Biolabs      |
| Neutravidin agarose beads                                    | Thermo Scientific        |
| N-hydroxysulfosuccinimide (Sulfo-NHS)                        | Sigma-Aldrich            |
| Penicillin-Streptomycin Solution                             | Thermo Scientific        |
| PNGaseF                                                      | New England Biolabs      |
| Potassium chloride                                           | Sigma-Aldrich            |
| Propidium Iodide                                             | Thermo Scientific        |
| Rapigest                                                     | Waters                   |
| RPMI 1640 medium                                             | Thermo Scientific        |
| Sodium bicarbonate                                           | Sigma-Aldrich            |
| Sodium chloride                                              | Sigma-Aldrich            |
| Sodium dodecyl sulfate (SDS)                                 | Sigma-Aldrich            |
| Sucrose                                                      | Sigma-Aldrich            |
| 2,2' -thiodiethanol                                          | Sigma-Aldrich            |
| Trypsin (MS-grade)                                           | Sigma-Aldrich            |
| Tris hydrochloride                                           | Bio-Rad                  |

**Supplementary Table 8. List of applied instruments and machines**

| <b>Name</b>                                   | <b>Producer</b>        | <b>Additional information</b> |
|-----------------------------------------------|------------------------|-------------------------------|
| Bio-Dot Microfiltration System                | Bio-Rad                |                               |
| Bruker Maxis II ETD Q-TOF mass spectrometer   | Bruker                 |                               |
| C18 spin column                               | Thermo Scientific      |                               |
| Cell counting chamber                         | Hirschmann Instruments |                               |
| Centrifuge                                    | Eppendorf              | 5810 R                        |
| ChemiDoc XRS+                                 | Bio-Rad                |                               |
| Confocal Microscope                           | Zeiss                  | LSCM 710                      |
| Dionex Ultimate 3000 NanoLC System            | Thermo Scientific      |                               |
| Elmasonic S 30 (H) Ultrasonic cleaning unit   | Elma Schmidbauer GmbH  |                               |
| FACS Attune Acoustic Focusing Cytometer       | Applied Biosystem      |                               |
| Filtropur vacuum filter                       | Sarstedt               | V50, 500ml, 0.2µm             |
| 26-gauge needle                               | Sigma                  |                               |
| Incubator                                     | Eppendorf              | Galaxy 170R                   |
| Objective for Confocal Microscope             | Zeiss                  | 63x NA=1.4 Plan Apo           |
| Polycarbonate UC tube                         | Beckman                | 10.4 ml                       |
| PowerPac Universal                            | Bio-Rad                |                               |
| Streamline Class II Biological Safety Cabinet | Esco                   |                               |
| Synergy Mx Microplate Reader                  | BioTek                 |                               |
| T25, T75 flask                                | Eppendorf              |                               |
| Thermoblock                                   | Biosan                 | CH-100                        |
| UC fixed rotor                                | Beckman                | 70.1 Ti                       |
| Ultracentrifuge                               | Beckman                | L7-55                         |
