# Supplementary material for: Covalently modified carboxyl side chains on cell surface leads to a novel method toward topology analysis of transmembrane proteins
Source: PubMed Central journal article supplement (PMC6823493; doi:10.1038/s41598-019-52188-4), 2019-10-31

## Supplementary Table 3.

List of the predicted topology of the modified TMPs including the modified aspartic and glutamic acids from our experiments and already existing other experimental results

### Legend of the graphics:

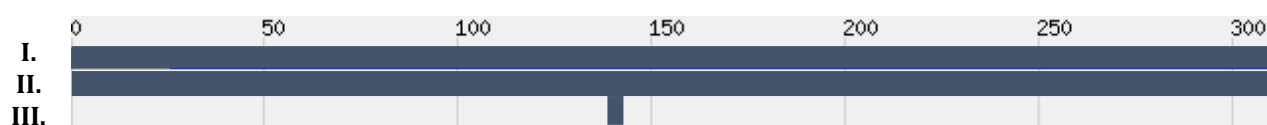

I. line: CCTOP Prediction

II. Line: Previous other experimental results\*

III. Line: Identified glutamic or aspartic acid

\*Continuous blue or red line means that the structure of the whole region of the protein was previously determined.

### Legend of the colours used in topology representation:

**Grey:** signal sequence

**Blue:** extracellular region

**Yellow:** membrane region

**Red:** intracellular region

UNIPROT ID

Topology representation

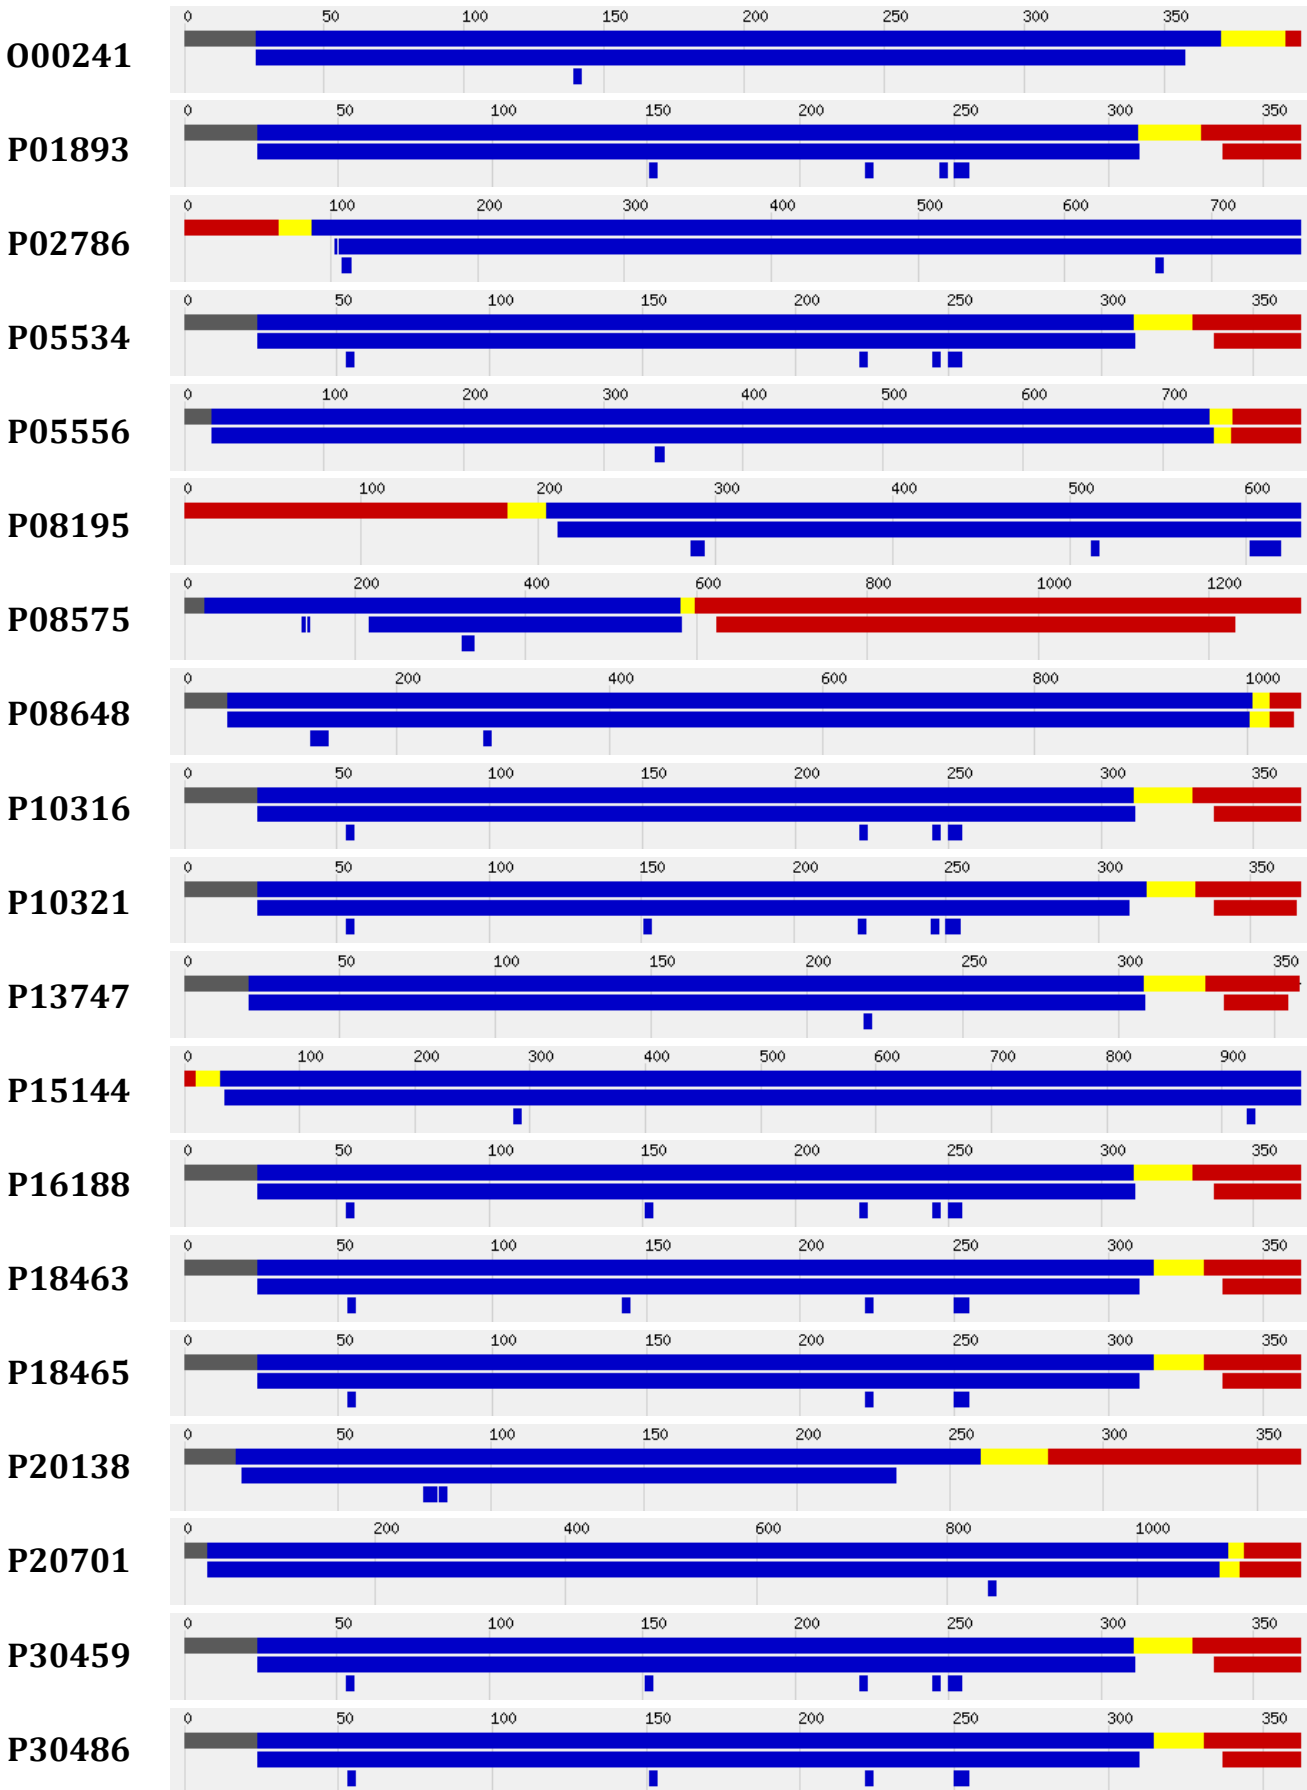

UNIPROT ID

# Topology representation

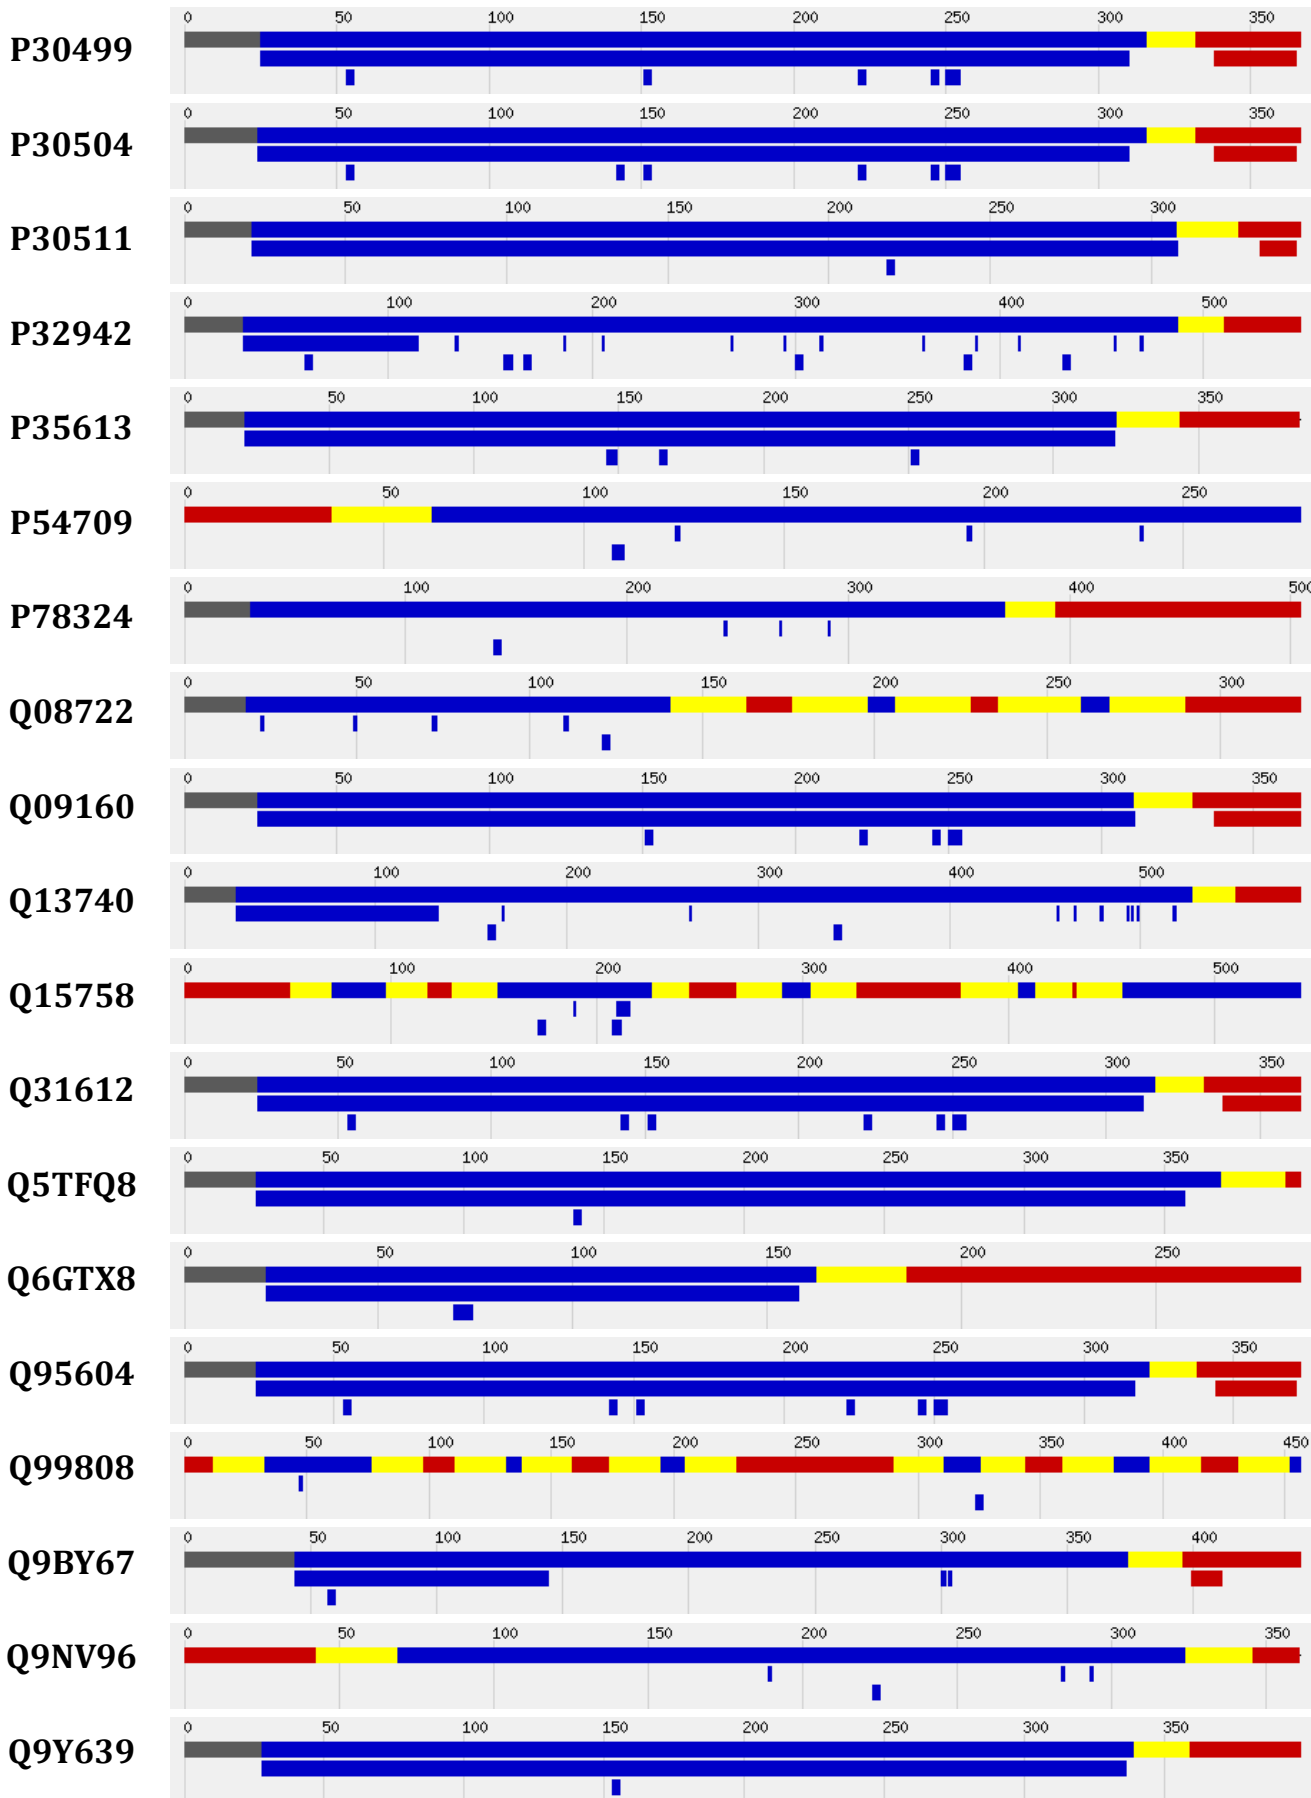

Supplement: 41598_2019_52188_MOESM2_ESM.pdf [file 41598_2019_52188_MOESM2_ESM.pdf]
